# Supplementary material for: Sex-Specific Impact of Fkbp5 on Hippocampal Response to Acute Alcohol Injection: Involvement in Alterations of Metabolism-Related Pathways
Source: MDPI journal article supplement (doi:10.3390/cells13010089), 2023-12-31
Supplement: s1 [file s1]

Article

# Sex-Specific Impact of Fkbp5 on Hippocampal Response to Acute Alcohol Injection: Involvement in Alterations of Metabolism-Related Pathways

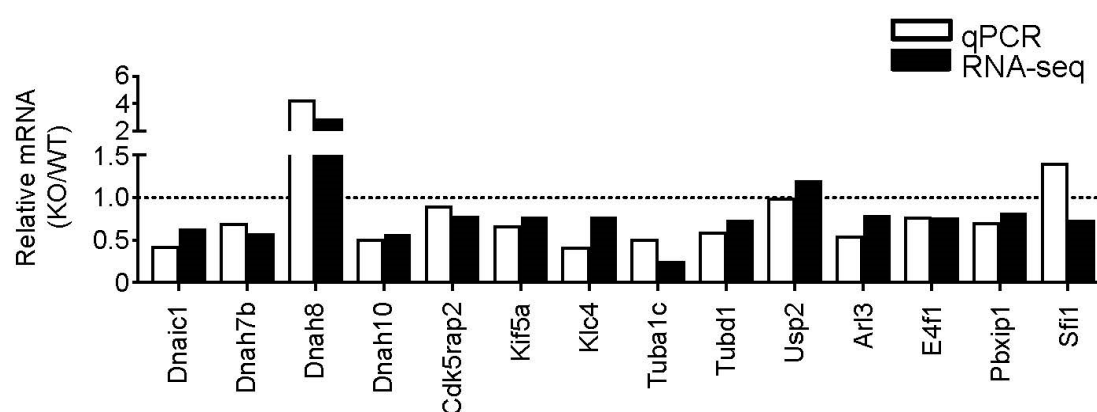

**Figure S1.** Microtubule-associated gene qRT-PCR confirmation by fold-change between KO and WT.

## Naïve network 1-KOWT\_adjP05DEG

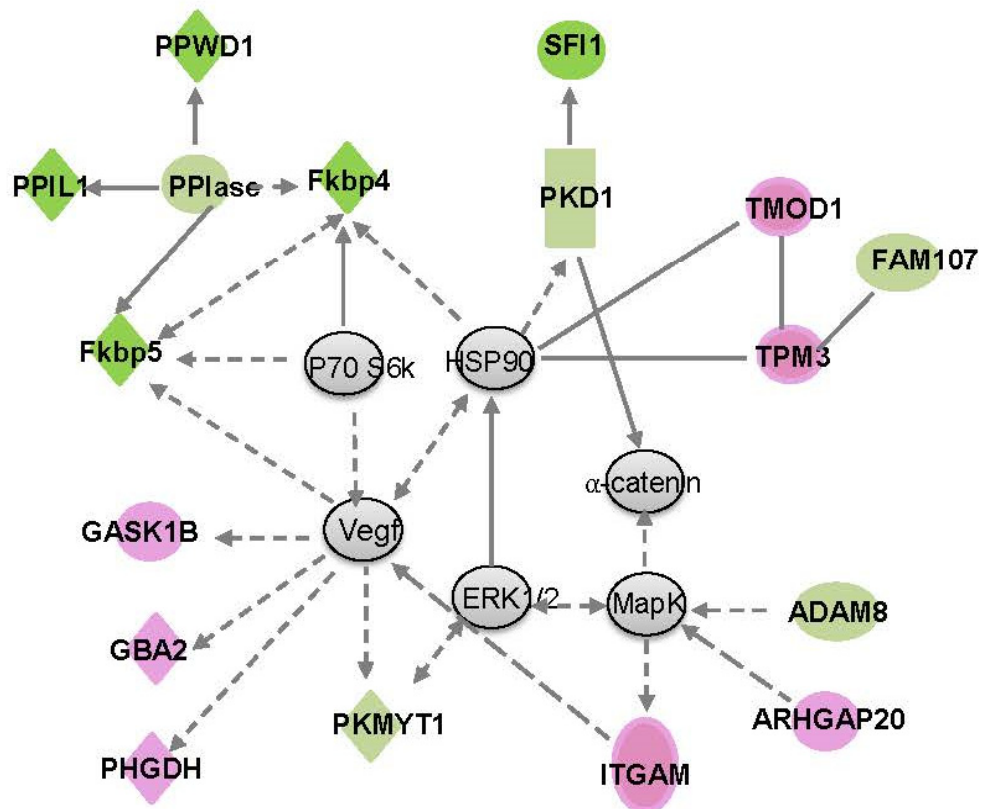

**Figure S2.** IPA gene network showed *Fkbp5* elimination-associated downregulation of PPIase family members and other genes (colored in green), and up-regulation of some other genes (colored in pink) at baseline.

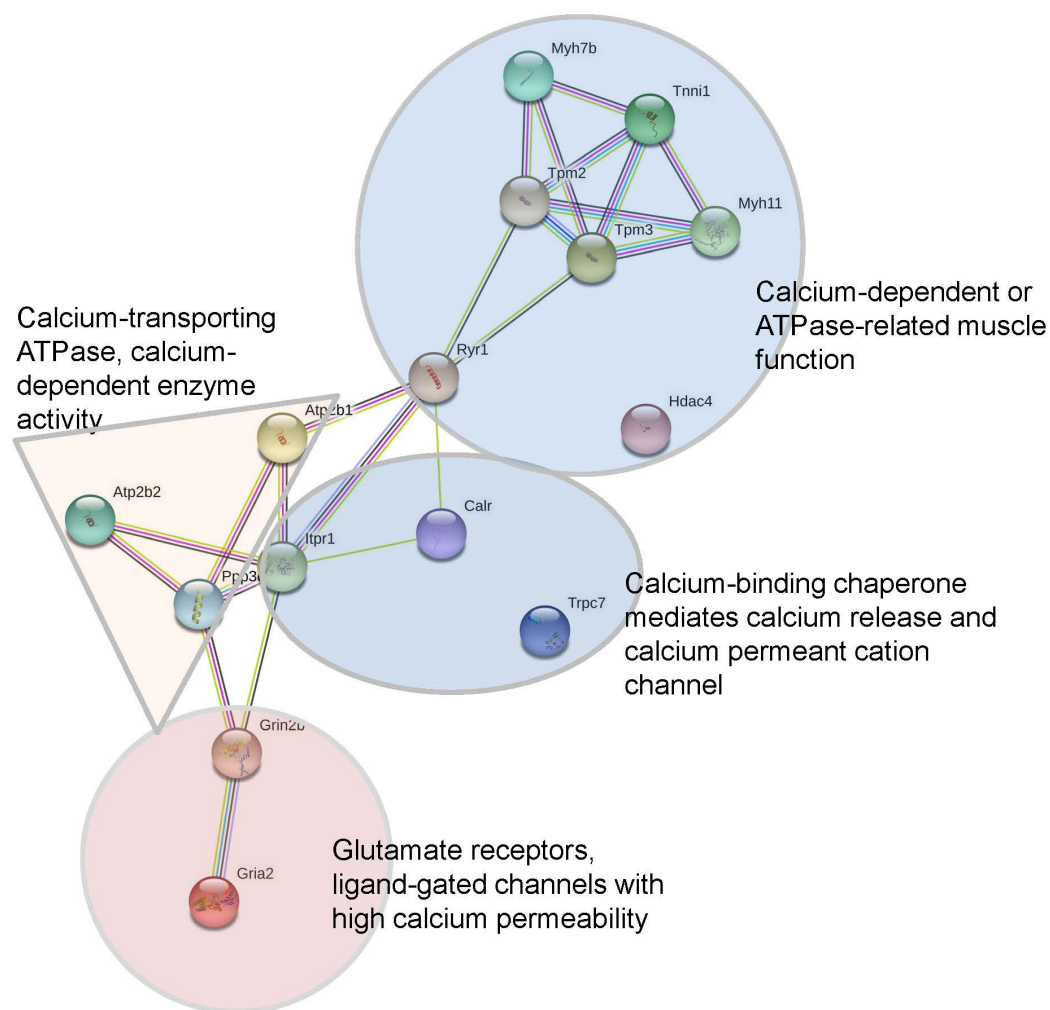

**Figure S3.** STRING analysis indicated inter-relationship of DEGs that have calcium-dependent, calcium binding, or calcium transporting functions.

## Supplemental Tables

**Table S1.** Disease and functions affected by loss function of *Fkbp5*. The common DEGs (KO vs WT) in both sex were used as input and have identified top disease and function with their significant score and number of focused molecules.

| Top Diseases and Functions- Naive                                                               | Score | #Focus<br>Molecules |
|-------------------------------------------------------------------------------------------------|-------|---------------------|
| Endocrine System Development and Function, Lipid Metabolism, Small Molecule Biochemistry        | 47    | 22                  |
| Cell Morphology, Cell-To-Cell Signaling and Interaction, Small Molecule Biochemistry            | 47    | 22                  |
| Cell Death and Survival, Cellular Compromise, Neurological Disease                              | 31    | 16                  |
| Energy Production, Lipid Metabolism, Small Molecule Biochemistry                                | 26    | 14                  |
| Cell-To-Cell Signaling and Interaction, Cellular Assembly and Organization, Reproductive System |       |                     |
| <u>Development and Function</u>                                                                 | 17    | 10                  |

**Table S2.** Differential expressed gene list with p<0.05, highlighted genes with fold change >2, orange for increasing, and gray for decreasing.

| gene          | Naïve Male |         |        |           | Naïve Female |         |        |          | Alc Male |         |        |          | Alc Female |         |        |          |
|---------------|------------|---------|--------|-----------|--------------|---------|--------|----------|----------|---------|--------|----------|------------|---------|--------|----------|
|               | WT         | KO      | log2FC | padj      | WT           | KO      | log2FC | padj     | WT       | KO      | log2FC | padj     | WT         | KO      | log2FC | padj     |
| Serpina3m     | 1.59       | 125.89  | 6.31   | 7.94E-61  | 0.84         | 194.41  | 7.85   | 1.29E-23 | 0.24     | 152.38  | 9.31   | 1.24E-18 | 1.34       | 150.96  | 6.82   | 6.98E-04 |
| Serpina3f     | 3.24       | 57.19   | 4.14   | 1.73E-20  | 2.01         | 101.77  | 5.66   | 2.08E-10 | 2.14     | 77.53   | 5.18   | 4.55E-09 | 1.52       | 74.6    | 5.62   | 2.94E-02 |
| Tagap         | 39.06      | 162.26  | 2.05   | 2.14E-22  | 35.4         | 153.81  | 2.12   | 1.04E-21 | 55.71    | 168.33  | 1.6    | 1.21E-14 | 57.57      | 165.24  | 1.52   | 1.20E-12 |
| Tmem181b-ps   | 1949.46    | 7536.09 | 1.95   | 6.35E-68  | 1898.2       | 6551.39 | 1.79   | 4.18E-89 | 1788     | 7006.17 | 1.97   | 8.34E-43 | 1929.7     | 7846.64 | 2.02   | 9.53E-98 |
| Dnahc8        | 23.2       | 86.24   | 1.89   | 5.66E-11  | 18.17        | 98.66   | 2.44   | 1.40E-17 | 27.21    | 80.2    | 1.56   | 5.84E-07 | 30.49      | 82.83   | 1.44   | 3.91E-06 |
| 9030025P20Rik | 38.4       | 128.2   | 1.74   | 5.32E-14  | 37.67        | 114.64  | 1.61   | 4.99E-11 | 27.45    | 138.66  | 2.34   | 3.44E-22 | 36.44      | 144.86  | 1.99   | 1.84E-11 |
| Col2a1        | 20.61      | 67.69   | 1.72   | 1.99E-04  | 25.94        | 80.03   | 1.63   | 1.07E-07 | 22.68    | 54.8    | 1.27   | 1.46E-03 | 26.87      | 71.38   | 1.41   | 4.66E-05 |
| Anxa4         | 199.68     | 511.91  | 1.36   | 2.67E-21  | 172.13       | 479.54  | 1.48   | 7.70E-16 | 210.5    | 459.8   | 1.13   | 1.80E-06 | 207.32     | 548.15  | 1.4    | 2.18E-26 |
| Chia          | 34.76      | 80.19   | 1.21   | 2.43E-02  | 38.86        | 80.58   | 1.05   | 4.29E-03 | 35.3     | 94.54   | 1.42   | 1.52E-06 | 43.33      | 109.54  | 1.34   | 6.75E-03 |
| 3110052M02Rik | 532.14     | 1086.04 | 1.03   | 1.18E-24  | 507.45       | 1022.21 | 1.01   | 3.73E-21 | 404.7    | 1009.98 | 1.32   | 5.25E-26 | 414.35     | 1053.57 | 1.35   | 4.39E-34 |
| Pot1b         | 298.93     | 128.21  | -1.22  | 1.63E-15  | 268.4        | 95.34   | -1.49  | 4.13E-21 | 292.6    | 107.21  | -1.45  | 2.36E-19 | 285.92     | 120.38  | -1.25  | 1.84E-13 |
| Tagap1        | 451.07     | 171.87  | -1.39  | 4.22E-26  | 427.14       | 166.44  | -1.36  | 1.04E-25 | 399.8    | 161.05  | -1.31  | 6.80E-20 | 413.03     | 166.6   | -1.31  | 4.23E-19 |
| Folh1         | 442.97     | 167.07  | -1.41  | 3.68E-03  | 430.57       | 194.2   | -1.15  | 8.35E-06 | 410.3    | 191.85  | -1.1   | 2.09E-03 | 495.48     | 238.48  | -1.05  | 7.28E-07 |
| Abca17        | 72.73      | 16.89   | -2.11  | 1.21E-10  | 59.89        | 12.79   | -2.23  | 1.82E-09 | 68.75    | 13.15   | -2.39  | 1.87E-12 | 54.95      | 19.41   | -1.5   | 2.63E-04 |
| Tmod4         | 77.89      | 13.25   | -2.56  | 3.32E-15  | 76.78        | 13.73   | -2.48  | 2.66E-14 | 43.14    | 15.27   | -1.5   | 1.32E-03 | 42.56      | 12.79   | -1.73  | 3.92E-04 |
| Cml5          | 72.09      | 11.93   | -2.6   | 1.99E-14  | 65.08        | 12.96   | -2.33  | 7.22E-11 | 71.28    | 15.55   | -2.2   | 2.72E-11 | 49.3       | 14.14   | -1.8   | 5.46E-05 |
| Fkbp5         | 1653.18    | 191.71  | -3.11  | 3.42E-124 | 1670.8       | 191     | -3.13  | 5.95E-93 | 2818     | 326.15  | -3.11  | 2.32E-57 | 2591.2     | 271.16  | -3.26  | 9.63E-16 |
| Pi16          | 31.8       | 66.77   | 1.07   | 3.73E-03  | 24.23        | 71.28   | 1.56   | 1.70E-02 | 30.9     | 61.67   | 1      | 1.99E-02 | 34.49      | 75.7    | 1.13   | 2.82E-03 |
| Glo1          | 1665.39    | 3491.52 | 1.07   | 5.35E-37  | 1689.7       | 3382.93 | 1      | 3.31E-40 | 1676     | 3474.84 | 1.05   | 7.54E-28 | 1722.7     | 3431.18 | 0.99   | 7.35E-26 |
| Marveld2      | 104.75     | 50.17   | -1.06  | 8.21E-05  | 101.24       | 49.55   | -1.03  | 2.05E-04 | 126.1    | 53.17   | -1.25  | 1.99E-07 | 119.1      | 74.11   | -0.68  | 3.21E-02 |
| Rnps1         | 1056.39    | 499.87  | -1.08  | 3.11E-26  | 1035.1       | 501.17  | -1.05  | 2.87E-28 | 1089     | 553.9   | -0.98  | 2.15E-18 | 1138.7     | 542.36  | -1.07  | 3.78E-22 |
| Rps2          | 1001.07    | 464.03  | -1.11  | 4.71E-22  | 986.83       | 447.14  | -1.14  | 2.56E-32 | 792.6    | 424.53  | -0.9   | 7.11E-14 | 1106       | 330.07  | -1.74  | 1.52E-54 |
| Rsph3a        | 90.35      | 38.23   | -1.24  | 1.21E-03  | 84.96        | 41.61   | -1.03  | 8.71E-04 | 85.87    | 45.12   | -0.93  | 5.28E-03 | 94.41      | 36.18   | -1.38  | 4.62E-06 |
| Pkmyt1        | 110.94     | 45.24   | -1.29  | 3.77E-07  | 110.42       | 55.61   | -0.99  | 2.37E-04 | 117.4    | 53.96   | -1.12  | 1.80E-05 | 132.96     | 55.74   | -1.25  | 5.19E-07 |
| Tdrd6         | 39.9       | 111.19  | 1.48   | 2.46E-09  | 40.75        | 94.82   | 1.22   | 1.24E-05 | 41.69    | 76.77   | 0.88   | 1.69E-02 | 56.34      | 100.21  | 0.83   | 1.04E-02 |
| Zfp758        | 379.52     | 225.19  | -0.75  | 1.95E-07  | 429.14       | 201.71  | -1.09  | 9.42E-16 | 274.2    | 153.02  | -0.84  | 9.13E-07 | 336.48     | 165.46  | -1.02  | 2.09E-10 |

|               |         |         |       |          |        |         |       |          |       |         |       |          |        |         |       |          |
|---------------|---------|---------|-------|----------|--------|---------|-------|----------|-------|---------|-------|----------|--------|---------|-------|----------|
| Gpr115        | 114.1   | 59.02   | -0.95 | 3.79E-04 | 104.43 | 60.7    | -0.78 | 8.67E-03 | 109.1 | 44.83   | -1.28 | 5.60E-07 | 112.72 | 46.52   | -1.28 | 2.83E-06 |
| H2-T24        | 249.69  | 99.59   | -1.33 | 1.81E-15 | 230.13 | 109.53  | -1.07 | 4.46E-10 | 203.3 | 102.51  | -0.99 | 3.36E-05 | 247    | 130.79  | -0.92 | 8.95E-04 |
| Serpina3n     | 1289.06 | 4005.84 | 1.64  | 3.70E-22 | 1317.4 | 5617.9  | 2.09  | 1.69E-08 | 1489  | 4535.35 | 1.61  | 6.11E-06 | 1563.2 | 4489    | 1.52  | 3.34E-01 |
| Ldb3          | 104.4   | 418.12  | 2     | 5.48E-10 | 143.02 | 415.78  | 1.54  | 1.71E-04 | 149.4 | 230.58  | 0.63  | 1.00E+00 | 162.74 | 434.35  | 1.42  | 7.35E-04 |
| Ccl27a        | 170.9   | 439.47  | 1.36  | 1.03E-02 | 151.71 | 398.45  | 1.39  | 3.03E-03 | 162.9 | 499.37  | 1.62  | 3.03E-03 | 315.49 | 507.54  | 0.69  | 9.75E-02 |
| Tspan11       | 55.33   | 95.69   | 0.79  | 6.94E-02 | 28.35  | 134.14  | 2.24  | 3.61E-07 | 68.43 | 146.06  | 1.09  | 1.52E-02 | 49.57  | 156.08  | 1.65  | 1.26E-03 |
| 1500015A07Rik | 524.64  | 208.03  | -1.33 | 1.09E-26 | 711.53 | 196.32  | -1.86 | 2.33E-13 | 552.6 | 253.02  | -1.13 | 3.46E-18 | 502.25 | 255.94  | -0.97 | 2.47E-01 |
| Npy2r         | 921.68  | 1667.43 | 0.86  | 1.40E-08 | 845.98 | 1779.93 | 1.07  | 6.25E-08 | 845.2 | 1358.35 | 0.68  | 7.92E-01 | 841.57 | 1332.67 | 0.66  | 2.03E-03 |
| Sh3tc2        | 163.2   | 123.78  | -0.4  | 2.53E-01 | 261.25 | 113.96  | -1.2  | 6.13E-03 | 165.2 | 85.07   | -0.96 | 1.30E-05 | 176.21 | 94.07   | -0.91 | 2.02E-02 |
| Nudt19        | 1697.8  | 1052.28 | -0.69 | 4.25E-03 | 1711.2 | 1055.28 | -0.7  | 1.27E-01 | 1559  | 866.33  | -0.85 | 1.63E-07 | 1713.9 | 748.28  | -1.2  | 2.14E-31 |
| Zfp488        | 208.17  | 118.04  | -0.82 | 1.92E-05 | 195.42 | 106.1   | -0.88 | 1.90E-02 | 325.5 | 243.49  | -0.42 | 4.58E-01 | 336.63 | 141.31  | -1.25 | 2.26E-02 |
| H2-T23        | 168.41  | 83.44   | -1.01 | 9.10E-07 | 156.57 | 115.14  | -0.44 | 6.59E-01 | 221.1 | 114.06  | -0.95 | 2.60E-04 | 234.65 | 126.3   | -0.89 | 3.13E-04 |
| Eps8l1        | 15.37   | 97.34   | 2.66  | 4.87E-01 | 15.47  | 168.6   | 3.45  | 7.52E-03 | 13.77 | 102.22  | 2.89  | 9.05E-02 | 16.47  | 187.38  | 3.51  | 2.80E-02 |
| Aox4          | 33.78   | 117.1   | 1.79  | 7.67E-02 | 29.17  | 103.83  | 1.83  | 3.95E-12 | 28.65 | 102.9   | 1.84  | 2.04E-01 | 25.06  | 176.28  | 2.81  | 8.81E-12 |
| Pla2g4e       | 871.04  | 344.25  | -1.34 | 6.36E-01 | 900.89 | 260.4   | -1.79 | 4.12E-04 | 794.4 | 306.3   | -1.37 | 2.63E-01 | 834.33 | 300.82  | -1.47 | 8.83E-17 |
| Rnaset2b      | 63.08   | 17.65   | -1.84 | 8.08E-01 | 10.82  | 0.98    | -3.47 | 1.16E-02 | 132.4 | 44.39   | -1.58 | 1.00E+00 | 115.75 | 0.27    | -8.74 | 2.26E-05 |
| Gdpd3         | 218.09  | 41.08   | -2.41 | 3.64E-07 | 162.98 | 32.29   | -2.34 | 4.34E-27 | 73.18 | 36.1    | -1.02 | 1.00E+00 | 218.53 | 40.85   | -2.42 | 2.56E-01 |
| Alpk1         | 231.76  | 481.29  | 1.05  | 5.32E-01 | 222.83 | 322.9   | 0.54  | 8.98E-01 | 227.2 | 647.76  | 1.51  | 1.01E-05 | 287.24 | 1055.27 | 1.88  | 4.29E-62 |
| Vmn2r29       | 40.3    | 51.88   | 0.36  | 1.00E+00 | 29.33  | 74.34   | 1.34  | 1.23E-01 | 14.79 | 65.13   | 2.14  | 1.40E-02 | 25.49  | 85.56   | 1.75  | 2.25E-02 |
| 2900052N01Rik | 2753.45 | 1342.94 | -1.04 | 3.90E-01 | 2735.9 | 1312.43 | -1.06 | 2.80E-02 | 2814  | 1381.1  | -1.03 | 4.08E-23 | 2520.9 | 1589.34 | -0.67 | 2.55E-01 |
| Slc26a10      | 186.91  | 517.7   | 1.47  | 1.05E-04 | 222.32 | 565.07  | 1.35  | 6.99E-06 | 360.5 | 497.47  | 0.46  | 1.00E+00 | 301.31 | 421.28  | 0.48  | 7.57E-01 |
| 4833420G17Rik | 467.52  | 1120.23 | 1.26  | 1.52E-29 | 465.63 | 1020.71 | 1.13  | 3.51E-01 | 514.6 | 907.59  | 0.82  | 1.57E-01 | 535.54 | 1026.04 | 0.94  | 5.63E-11 |
| Tpm3          | 524.03  | 1173.78 | 1.16  | 1.01E-03 | 525.59 | 1180.97 | 1.17  | 3.28E-04 | 738.9 | 1185.78 | 0.68  | 3.95E-01 | 728.91 | 1182.82 | 0.7   | 1.57E-01 |
| Eif3j         | 84.76   | 180.88  | 1.09  | 6.80E-02 | 72.21  | 161.32  | 1.16  | 1.44E-03 | 97.27 | 169.99  | 0.81  | 6.17E-02 | 93.91  | 157.23  | 0.74  | 2.87E-03 |
| Klk6          | 41.83   | 79.09   | 0.92  | 4.80E-01 | 47.67  | 111.45  | 1.23  | 9.78E-04 | 36.34 | 105.69  | 1.54  | 1.91E-04 | 43     | 73.62   | 0.78  | 3.84E-01 |
| Lyve1         | 34.95   | 43.05   | 0.3   | 9.23E-01 | 21.91  | 46      | 1.07  | 3.82E-02 | 53.34 | 81.12   | 0.6   | 3.39E-01 | 35.89  | 76.63   | 1.09  | 1.15E-03 |
| Nptxr         | 147.87  | 170.3   | 0.2   | 9.74E-01 | 144.52 | 215.17  | 0.57  | 1.79E-01 | 58.08 | 160.18  | 1.46  | 1.46E-08 | 365.99 | 146.77  | -1.32 | 5.35E-09 |
| Stbd1         | 203.09  | 140.87  | -0.53 | 9.43E-01 | 197.17 | 93.93   | -1.07 | 1.60E-02 | 186.4 | 140.31  | -0.41 | 1.00E+00 | 210.34 | 103.22  | -1.03 | 3.56E-02 |
| Fxyd2         | 111.04  | 71.72   | -0.63 | 4.71E-01 | 143.8  | 71.45   | -1.01 | 4.12E-02 | 140.6 | 63.02   | -1.16 | 3.21E-07 | 142.5  | 77.81   | -0.87 | 2.61E-01 |
| Mid1          | 1255.6  | 701.56  | -0.84 | 9.23E-01 | 3609.4 | 520.53  | -2.79 | 3.06E-03 | 566.8 | 1073.86 | 0.92  | 1.00E+00 | 2592.2 | 379.77  | -2.77 | 9.30E-03 |

|               |         |         |       |          |        |         |       |          |       |         |       |          |        |         |       |          |
|---------------|---------|---------|-------|----------|--------|---------|-------|----------|-------|---------|-------|----------|--------|---------|-------|----------|
| Hmgcs2        | 519.86  | 249.89  | -1.06 | 2.53E-04 | 422.59 | 312.38  | -0.44 | 5.43E-01 | 617.5 | 281.02  | -1.14 | 1.36E-13 | 522.4  | 404.62  | -0.37 | 5.97E-01 |
| Rec8          | 172.28  | 32.65   | -2.4  | 1.51E-29 | 59.34  | 48.61   | -0.29 | 1.00E+00 | 65.24 | 91.88   | 0.49  | 1.00E+00 | 178.69 | 49.23   | -1.86 | 1.78E-02 |
| Pirt          | 48.39   | 99.95   | 1.05  | 1.34E-02 | 51.08  | 101.53  | 0.99  | 3.70E-04 | 86.93 | 69.54   | -0.32 | 9.94E-01 | 60.07  | 86.28   | 0.52  | 7.62E-01 |
| Casp1         | 79.18   | 143.51  | 0.86  | 8.80E-03 | 78.04  | 102.24  | 0.39  | 8.00E-01 | 61.21 | 95.9    | 0.65  | 8.66E-01 | 64.47  | 153.53  | 1.25  | 2.09E-08 |
| Ddx4          | 77.8    | 139.84  | 0.85  | 3.50E-04 | 75.84  | 95.28   | 0.33  | 6.62E-01 | 65.89 | 114.9   | 0.8   | 7.77E-01 | 59.74  | 128.59  | 1.11  | 4.30E-02 |
| 6030422M02Rik | 86.74   | 110.89  | 0.35  | 9.50E-01 | 81.76  | 105.08  | 0.36  | 9.25E-01 | 53.57 | 128.72  | 1.26  | 8.13E-03 | 76.87  | 143.91  | 0.9   | 1.75E-03 |
| Ccdc80        | 153.83  | 177.57  | 0.21  | 9.39E-01 | 139.49 | 195.83  | 0.49  | 8.40E-02 | 147.7 | 235.05  | 0.67  | 1.69E-02 | 144.24 | 328.35  | 1.19  | 5.54E-08 |
| Pdcd5         | 133.82  | 121.41  | -0.14 | 9.86E-01 | 137.75 | 83.69   | -0.72 | 3.98E-02 | 133.6 | 91.71   | -0.54 | 1.00E+00 | 137.28 | 58.59   | -1.23 | 6.50E-04 |
| Cdh1          | 74.08   | 62.84   | -0.24 | 1.00E+00 | 35.41  | 87.38   | 1.3   | 4.41E-03 | 80.39 | 42.94   | -0.9  | 1.40E-02 | 60.96  | 78.41   | 0.36  | 1.00E+00 |
| Ubc           | 3014.73 | 1816.23 | -0.73 | 7.20E-17 | 3154.3 | 2645.71 | -0.25 | 8.35E-01 | 3451  | 1631.5  | -1.08 | 5.85E-03 | 2830.3 | 2043.2  | -0.47 | 9.34E-02 |
| Olfml3        | 371.38  | 208.78  | -0.83 | 7.24E-03 | 310.97 | 311.31  | 0     | 1.00E+00 | 328.5 | 205.09  | -0.68 | 1.00E+00 | 489.22 | 242.81  | -1.01 | 5.79E-04 |
| 2900041M22Rik | 60.66   | 29.55   | -1.04 | 1.42E-02 | 55.75  | 28.61   | -0.96 | 3.33E-02 | 41.22 | 36.94   | -0.16 | 1.00E+00 | 47.54  | 28.53   | -0.74 | 3.06E-01 |
| Gm1821        | 287.66  | 110.51  | -1.38 | 9.83E-01 | 245.3  | 24.93   | -3.3  | 9.15E-01 | 202.9 | 1749.68 | 3.11  | 1.63E-04 | 1094.5 | 394.71  | -1.47 | 9.96E-01 |
| Krt12         | 195.58  | 480.49  | 1.3   | 1.60E-01 | 157.22 | 393.01  | 1.32  | 2.76E-02 | 381.3 | 545.09  | 0.52  | 1.00E+00 | 192.27 | 553.64  | 1.53  | 1.86E-01 |
| Pglyrp1       | 57.76   | 77.37   | 0.42  | 9.52E-01 | 48.79  | 99.23   | 1.02  | 7.11E-02 | 37.89 | 133.72  | 1.82  | 6.15E-03 | 70.15  | 144.18  | 1.04  | 3.91E-01 |
| Rpl28         | 68.49   | 58.22   | -0.23 | 1.00E+00 | 103.85 | 41.08   | -1.34 | 1.02E-01 | 113.7 | 46.35   | -1.29 | 2.68E-07 | 110.9  | 47.85   | -1.21 | 4.27E-01 |
| Mir5109       | 25.13   | 73.17   | 1.54  | 9.97E-01 | 29.35  | 18.4    | -0.67 | 8.30E-01 | 16.83 | 15.69   | -0.1  | 1.00E+00 | 120.64 | 19.09   | -2.66 | 1.75E-03 |
| Lars2         | 1574.47 | 3891.09 | 1.31  | 9.86E-01 | 2064.5 | 1321.26 | -0.64 | 5.95E-01 | 1562  | 1356.01 | -0.2  | 6.21E-01 | 6913.1 | 1476.42 | -2.23 | 1.98E-03 |
| A930005H10Rik | 290.35  | 494.96  | 0.77  | 6.62E-01 | 241.79 | 361.79  | 0.58  | 6.46E-01 | 235   | 473.39  | 1.01  | 5.85E-02 | 285.89 | 648.08  | 1.18  | 4.59E-21 |
| Cd180         | 32.52   | 47.3    | 0.54  | 5.17E-01 | 27.15  | 65.18   | 1.26  | 3.69E-02 | 13.36 | 27.78   | 1.06  | 2.66E-01 | 23.4   | 27.18   | 0.22  | 1.00E+00 |
| Ccdc61        | 131.04  | 149.75  | 0.19  | 1.00E+00 | 91.16  | 188.53  | 1.05  | 3.62E-02 | 74.84 | 159.4   | 1.09  | 8.05E-02 | 99.88  | 161.41  | 0.69  | 1.61E-01 |
| Cdh3          | 65.52   | 30.67   | -1.1  | 6.33E-01 | 60.19  | 62.88   | 0.06  | 1.00E+00 | 91.15 | 44.25   | -1.04 | 4.23E-02 | 79.78  | 56.12   | -0.51 | 9.28E-01 |
| Ccrl1         | 35.36   | 13.11   | -1.43 | 4.05E-01 | 41.42  | 23.96   | -0.79 | 4.13E-01 | 84.72 | 37.57   | -1.17 | 1.19E-04 | 71.87  | 38.92   | -0.88 | 6.40E-01 |
| Trh           | 136.54  | 35.69   | -1.94 | 7.37E-05 | 70.23  | 34.27   | -1.04 | 8.89E-01 | 76.49 | 62.38   | -0.29 | 1.00E+00 | 86.72  | 97.77   | 0.17  | 1.00E+00 |
| Tuba1c        | 347.71  | 89.13   | -1.96 | 1.64E-14 | 362.76 | 420.82  | 0.21  | 1.00E+00 | 419.1 | 193.85  | -1.11 | 8.24E-01 | 386.86 | 264.14  | -0.55 | 1.00E+00 |
| Rad51ap2      | 24.44   | 68.76   | 1.49  | 4.95E-03 | 29.88  | 48.87   | 0.71  | 2.44E-01 | 41.92 | 48.04   | 0.2   | 1.00E+00 | 36.02  | 54.24   | 0.59  | 4.24E-01 |
| Wdfy1         | 789.66  | 1746.75 | 1.15  | 1.21E-10 | 857.37 | 1501.09 | 0.81  | 2.14E-01 | 955.7 | 1478.06 | 0.63  | 1.89E-01 | 985.8  | 1403.06 | 0.51  | 3.10E-01 |
| Cela1         | 29.55   | 62      | 1.07  | 2.98E-02 | 33.69  | 47.96   | 0.51  | 6.20E-01 | 38.28 | 57.13   | 0.58  | 1.00E+00 | 40.67  | 60.8    | 0.58  | 7.46E-01 |
| Myo7a         | 629.8   | 878.1   | 0.48  | 7.42E-01 | 731.9  | 1056.2  | 0.53  | 8.40E-02 | 894.3 | 1095.28 | 0.29  | 1.00E+00 | 565.24 | 1139.06 | 1.01  | 8.32E-20 |
| Iyd           | 86.46   | 120.3   | 0.48  | 9.43E-01 | 49.77  | 137.59  | 1.47  | 1.62E-06 | 80.95 | 87.02   | 0.1   | 1.00E+00 | 82.53  | 81.14   | -0.02 | 1.00E+00 |

|               |        |        |       |          |        |        |       |          |       |        |       |          |        |        |       |          |
|---------------|--------|--------|-------|----------|--------|--------|-------|----------|-------|--------|-------|----------|--------|--------|-------|----------|
| Anxa9         | 70.26  | 95.46  | 0.44  | 5.47E-01 | 73.97  | 76.7   | 0.05  | 1.00E+00 | 69.54 | 98.7   | 0.51  | 6.59E-01 | 70.36  | 141.03 | 1     | 3.66E-05 |
| Lipg          | 53.49  | 68.66  | 0.36  | 6.68E-01 | 38.88  | 61.75  | 0.67  | 7.22E-01 | 64.36 | 90.64  | 0.49  | 1.00E+00 | 45.15  | 119.54 | 1.4   | 2.10E-03 |
| Slc39a2       | 295.99 | 339.02 | 0.2   | 1.00E+00 | 286.23 | 269.76 | -0.09 | 1.00E+00 | 136.8 | 306.9  | 1.17  | 1.27E-04 | 161.65 | 269.27 | 0.74  | 7.78E-01 |
| Vill          | 233.41 | 259.92 | 0.16  | 1.00E+00 | 187.72 | 242.13 | 0.37  | 1.00E+00 | 231.7 | 283.64 | 0.29  | 1.00E+00 | 165.64 | 371.54 | 1.17  | 1.50E-02 |
| Snrpf         | 91.42  | 97.73  | 0.1   | 1.00E+00 | 92.21  | 93.5   | 0.02  | 1.00E+00 | 79.96 | 93.4   | 0.22  | 1.00E+00 | 141.72 | 70.37  | -1.01 | 4.40E-05 |
| Xaf1          | 368.71 | 381.22 | 0.05  | 1.00E+00 | 352.06 | 364.24 | 0.05  | 1.00E+00 | 125.6 | 358.23 | 1.51  | 1.35E-05 | 274.44 | 479.21 | 0.8   | 8.19E-01 |
| Qrfpr         | 92.05  | 91.92  | 0     | 1.00E+00 | 74.95  | 81.2   | 0.12  | 1.00E+00 | 66.65 | 92.64  | 0.47  | 1.00E+00 | 54.64  | 118.92 | 1.12  | 2.27E-05 |
| G530011O06Rik | 192.69 | 189.52 | -0.02 | 1.00E+00 | 274.77 | 277.23 | 0.01  | 1.00E+00 | 150.6 | 321.44 | 1.09  | 6.12E-03 | 223.96 | 228.83 | 0.03  | 1.00E+00 |
| F13a1         | 86.17  | 79.59  | -0.11 | 1.00E+00 | 44.26  | 100.5  | 1.18  | 2.54E-02 | 71.01 | 111.89 | 0.66  | 5.07E-02 | 55.52  | 95.83  | 0.79  | 4.34E-01 |
| Mrc1          | 143.05 | 121.51 | -0.24 | 1.00E+00 | 66.77  | 150.29 | 1.17  | 4.53E-03 | 139.7 | 165.12 | 0.24  | 1.00E+00 | 112.67 | 173.04 | 0.62  | 2.17E-01 |
| Atp6ap1l      | 101.76 | 83.34  | -0.29 | 1.00E+00 | 91.46  | 79.21  | -0.21 | 1.00E+00 | 99.66 | 151.31 | 0.6   | 1.00E+00 | 58.2   | 150.38 | 1.37  | 9.80E-04 |
| Ano2          | 151.78 | 116.07 | -0.39 | 8.98E-01 | 152.46 | 70.12  | -1.12 | 1.85E-02 | 114.7 | 128.47 | 0.16  | 1.00E+00 | 135.82 | 119.92 | -0.18 | 1.00E+00 |
| Cthrc1        | 189.74 | 140.2  | -0.44 | 4.38E-01 | 189.37 | 121.93 | -0.64 | 1.64E-01 | 181.1 | 130.74 | -0.47 | 6.51E-01 | 168.36 | 53.61  | -1.65 | 2.20E-05 |
| Agxt2l1       | 425.61 | 302.98 | -0.49 | 8.40E-01 | 308.93 | 192.3  | -0.68 | 3.00E-01 | 745.4 | 477.4  | -0.64 | 2.85E-01 | 773.98 | 315.95 | -1.29 | 4.00E-04 |
| Fcrls         | 335.4  | 236.88 | -0.5  | 9.35E-01 | 300.72 | 454.11 | 0.59  | 6.96E-01 | 386.7 | 239.98 | -0.69 | 1.00E+00 | 444.78 | 150.83 | -1.56 | 1.17E-02 |
| Svep1         | 73.06  | 51.44  | -0.51 | 8.76E-01 | 75.36  | 66.05  | -0.19 | 1.00E+00 | 109.4 | 48.73  | -1.17 | 1.54E-04 | 81.88  | 65.38  | -0.32 | 1.00E+00 |
| Capza1        | 131.65 | 86.48  | -0.61 | 3.53E-01 | 120.74 | 105.11 | -0.2  | 1.00E+00 | 119.8 | 84.75  | -0.5  | 1.00E+00 | 162.57 | 71.03  | -1.19 | 7.40E-08 |
| Loxl2         | 56.09  | 29.36  | -0.93 | 4.88E-01 | 53.6   | 47.29  | -0.18 | 1.00E+00 | 96.56 | 46.84  | -1.04 | 4.21E-02 | 88.17  | 46.51  | -0.92 | 3.97E-01 |
| Exd1          | 66.98  | 34.63  | -0.95 | 1.06E-01 | 75.72  | 36.42  | -1.06 | 2.18E-03 | 59.21 | 32.59  | -0.86 | 4.10E-01 | 67.2   | 41.52  | -0.69 | 1.87E-01 |
| BC060267      | 383.2  | 190.07 | -1.01 | 3.77E-13 | 295.69 | 195.72 | -0.6  | 4.67E-01 | 256.1 | 195.15 | -0.39 | 2.05E-01 | 275.52 | 226.11 | -0.29 | 6.97E-01 |
| Ccl9          | 62.24  | 25.51  | -1.29 | 4.37E-04 | 52.75  | 35.32  | -0.58 | 8.04E-01 | 35.11 | 44.71  | 0.35  | 1.00E+00 | 52.59  | 45.15  | -0.22 | 1.00E+00 |

**Table S3.** DEGs between KO and WT have been identified to play roles in microtubule-associated function.

| Category      | Term                                      | P-Value  | Genes                                                       |
|---------------|-------------------------------------------|----------|-------------------------------------------------------------|
| GOTERM_CC_FAT | GO:0005875~microtubule associated complex | 0.01339  | KIF5A, DNAHC8, DNAHC7B, KLC4, DNAHC10, DNAIC1               |
| GOTERM_MF_FAT | GO:0003774~motor activity                 | 0.01613  | MYO1A, KIF5A, DNAHC8, DNAHC7B, MYH11, KLC4, DNAHC10, DNAIC1 |
| GOTERM_CC_FAT | GO:0030286~dynein complex                 | 0.02472  | DNAHC8, DNAHC7B, DNAHC10, DNAIC1                            |
| GOTERM_BP_FAT | GO:0007018~microtubule-based movement     | 0.034836 | KIF5A, DNAHC8, DNAHC7B, TUBD1, DNAHC10, TUBA1C              |
| GOTERM_MF_FAT | GO:0003777~microtubule motor activity     | 0.049777 | KIF5A, DNAHC8, DNAHC7B, KLC4, DNAHC10                       |

**Table S4.** Disease and functions affected by loss function of *Fkbp5*. The common DEGs (KO vs WT) in both sex were used as input and have identified top disease and function with their significant score and number of focused molecules.

| Top Diseases and Functions -Alcohol                                                                   | Score | Focus Molecules |
|-------------------------------------------------------------------------------------------------------|-------|-----------------|
| Lipid Metabolism, Small Molecule Biochemistry, Vitamin and Mineral Metabolism                         | 51    | 22              |
| Cancer, Gastrointestinal Disease, Organismal Injury and Abnormalities                                 | 31    | 15              |
| Cell Death and Survival, Inflammatory Response, Skeletal and Muscular System Development and Function | 28    | 14              |
| Cancer, Cell Morphology, Organismal Injury and Abnormalities                                          | 19    | 10              |
| Cellular Development, Embryonic Development, Organismal Development                                   | 14    | 8               |

**Table S5.** A list of primers used for Real-Time PCR quantification.

| Gene           | Forward                  | Reverse                |
|----------------|--------------------------|------------------------|
| <i>Anxa4</i>   | GTGTGGCATTGCGCGTAGTCTA   | TCTGGGCATCTTCAGTTGCG   |
| <i>Arl3</i>    | AACGCGGGCAAGACTACCTT     | TCTGATTTTCTCTGCCCCG    |
| <i>Cc2d1a</i>  | TGGGATTAATGAGGAGGAGCTG   | ATCCAGGTCTCTCATGCAGAGC |
| <i>Ccdc88c</i> | GCGCATCAACAAGCATGTCA     | GGGTCTTTGCCAATCATCAAGA |
| <i>Decr2</i>   | GGACCATGGAGGAGTGATTGTG   | TATTCTGGGGACCCCATTC    |
| <i>Dnah8</i>   | TGTTTGGGCAAGTATGTGGTTG   | CCACAGATAAAACGGGCAATTC |
| <i>Eps8l1</i>  | CCAAGTGACAGAGCACCTCAT    | TCAGCCATAACCACGGTGGA   |
| <i>Fkbp5</i>   | TGATGAGGGCACCAGTAACAATGG | CACCAAACATTGGGGCCTCG   |
| <i>Folh1</i>   | CTCACACCAGGTTACCCAGCAA   | TGCTGGACCACCCATGTGTT   |
| <i>Gapdh</i>   | ATCAACGGGAAGCCCATCAC     | TTGGCTCCACCCTTCAAGTG   |
| <i>Gpr111</i>  | GTACAGGAGCCAGTTGCTGAT    | TCCACGCAGCAGGTGTTCTT   |
| <i>GPR115</i>  | GCCATTGTTTTCAGGATCAGCA   | GCCATTGTTTTCAGGATCAGCA |
| <i>Gpr15</i>   | TGTTGCATCACAAGGAGGCT     | CCGCCACCGCAATAATAACG   |
| <i>H2-T24</i>  | TGAGGTTTTACCAATCGGATG    | ATGTGAAGTGGAGGGTGTGAGG |
| <i>Igfbp3</i>  | ACACCCAGAACTTCTCCTCCGA   | AGTTTGGGATGTGGACGCCT   |
| <i>Khsrp</i>   | ATGGTGGGCTTGATTATTGGC    | TTTGGACAGACTCAGGTGCTCC |
| <i>Kif5a</i>   | GAGCCACAGCATCTTCCTCATC   | TCTTTGCCTCGTCCAGAACG   |
| <i>Klk6</i>    | CCCTGCCTTGCTGACTTTCTCT   | AAGCACAGGGCCAGCATCTT   |



|                  |                         |                        |
|------------------|-------------------------|------------------------|
| <i>Park2</i>     | TTTTCATCTACTGCAAAGGCC   | TCACCACTCATCCGGTTTGG   |
| <i>Phgdh</i>     | GCTCACCTGTGGGATGATCATG  | TCTGCCGAGGCCAAGAATTC   |
| <i>Pi16</i>      | ACCTGCGATCCGAACCAGAT    | GCACACCAGCAAATGGATGTTA |
| <i>Pkd1</i>      | GGTGCTGGTGGAAACAATAACC  | ACGTTGGGAAGAACAGTGCG   |
| <i>Ppil1</i>     | GCCGGAAGTAGTGATTGCTAGC  | GGGCGCATGCTTCCAGTATA   |
| <i>PPWD1</i>     | GGTCACCGAGATGCTTGGGTAT  | GGTCACCGAGATGCTTGGGTAT |
| <i>Prss33</i>    | ACCTCCAGATCCTGCTCCTGTT  | AATGCTTGTGTTGCCACGGC   |
| <i>Rps2</i>      | CCTGTTCTCCCTGCCCATTAAAG | TCCCAATAGCGACGAAAGC    |
| <i>Rpl7</i>      | CAGAGTTGAAGGTGAAGCGCCTG | TCCTTGCCATCCTGGCCATC   |
| <i>Scnm1</i>     | ACTGAGGCTCCTTTGCTAACCC  | TGCAGTTGGCAAAGGAGGAC   |
| <i>Serpina3m</i> | ATGCCAGGCAAGCCAACAA     | CCCATGTGTCATCTGAGAAGCA |
| <i>Sfi1</i>      | GTCTTCGGAGAATGGAGGGAAG  | TTCTCATCTCCCGTTGCTG    |
| <i>Slc4a8</i>    | CTCATCAACGGCTCTGTGCTTC  | AGGGCTTCCCGCACTTTAAC   |
| <i>Zfp758</i>    | TGCTACCTGTGTAATCCATGTGT | AAATAGCTGGGACCTTCCAGGG |

**Table S6.** Enriched GO Term in KO and with and without alcohol.

| Naïve-female         |                                         |       |          |          |
|----------------------|-----------------------------------------|-------|----------|----------|
| Annotation Cluster 1 | Enrichment Score: 3.7366504535480676    |       |          |          |
| Category             | Term                                    | Count | %        | PValue   |
| GOTERM_BP_FAT        | GO:0007155~cell adhesion                | 27    | 6.733167 | 7.39E-05 |
| GOTERM_BP_FAT        | GO:0022610~biological adhesion          | 27    | 6.733167 | 7.62E-05 |
| GOTERM_BP_FAT        | GO:0016337~cell-cell adhesion           | 15    | 3.740648 | 3.27E-04 |
| GOTERM_BP_FAT        | GO:0007156~homophilic cell adhesion     | 10    | 2.493766 | 6.14E-04 |
| Annotation Cluster 2 | Enrichment Score: 3.197401244427676     |       |          |          |
| Category             | Term                                    | Count | %        | PValue   |
| GOTERM_MF_FAT        | GO:0043169~cation binding               | 115   | 28.6783  | 1.03E-05 |
| GOTERM_MF_FAT        | GO:0043167~ion binding                  | 116   | 28.92768 | 1.10E-05 |
| GOTERM_MF_FAT        | GO:0046872~metal ion binding            | 114   | 28.42893 | 1.15E-05 |
| GOTERM_MF_FAT        | GO:0046914~transition metal ion binding | 60    | 14.96259 | 0.250968 |
| GOTERM_MF_FAT        | GO:0008270~zinc ion binding             | 48    | 11.97007 | 0.316706 |
| Annotation Cluster 3 | Enrichment Score: 1.9365110186078869    |       |          |          |
| Category             | Term                                    | Count | %        | PValue   |
| GOTERM_CC_FAT        | GO:0005788~endoplasmic reticulum lumen  | 8     | 1.995012 | 7.38E-04 |
| GOTERM_CC_FAT        | GO:0044432~endoplasmic reticulum part   | 12    | 2.992519 | 0.009251 |
| GOTERM_CC_FAT        | GO:0005783~endoplasmic reticulum        | 22    | 5.486284 | 0.227017 |
| Naïve-male           |                                         |       |          |          |
| Annotation Cluster 1 | Enrichment Score: 1.9743421279742623    |       |          |          |
| Category             | Term                                    | Count | %        | PValue   |
| GOTERM_MF_FAT        | GO:0043167~ion binding                  | 99    | 27.73109 | 9.05E-04 |
| GOTERM_MF_FAT        | GO:0043169~cation binding               | 95    | 26.61064 | 0.003277 |
| GOTERM_MF_FAT        | GO:0046872~metal ion binding            | 91    | 25.4902  | 0.011435 |
| GOTERM_MF_FAT        | GO:0046914~transition metal ion binding | 61    | 17.08683 | 0.056392 |
| GOTERM_MF_FAT        | GO:0008270~zinc ion binding             | 50    | 14.0056  | 0.070274 |
| Annotation Cluster 2 | Enrichment Score: 1.86989562092467      |       |          |          |
| Category             | Term                                    | Count | %        | PValue   |
| GOTERM_CC_FAT        | GO:0005887~integral to plasma membrane  | 19    | 5.322129 | 0.010102 |
| GOTERM_CC_FAT        | GO:0031226~intrinsic to plasma membrane | 19    | 5.322129 | 0.014549 |
| GOTERM_CC_FAT        | GO:0044459~plasma membrane part         | 43    | 12.04482 | 0.016714 |
| Annotation Cluster 3 | Enrichment Score: 1.8133129296767974    |       |          |          |
| Category             | Term                                    | Count | %        | PValue   |

| GOTERM_CC_FAT        | GO:0030016~myofibril                                    | 7     | 1.960784 | 0.006872 |
|----------------------|---------------------------------------------------------|-------|----------|----------|
| GOTERM_CC_FAT        | GO:0043292~contractile fiber                            | 7     | 1.960784 | 0.008432 |
| GOTERM_CC_FAT        | GO:0030018~Z disc                                       | 5     | 1.40056  | 0.010243 |
| GOTERM_CC_FAT        | GO:0031674~I band                                       | 5     | 1.40056  | 0.01663  |
| GOTERM_CC_FAT        | GO:0044449~contractile fiber part                       | 6     | 1.680672 | 0.02178  |
| GOTERM_CC_FAT        | GO:0030017~sarcomere                                    | 5     | 1.40056  | 0.061332 |
| Alcohol-female       |                                                         |       |          |          |
| Category             | Term                                                    | Count | %        | PValue   |
| Annotation Cluster 1 | Enrichment Score: 1.304179881962957                     |       |          |          |
| GOTERM_BP_FAT        | GO:0046688~response to copper ion                       | 3     | 0.955414 | 0.004397 |
| GOTERM_BP_FAT        | GO:0010038~response to metal ion                        | 4     | 1.273885 | 0.04408  |
| GOTERM_CC_FAT        | GO:0005764~lysosome                                     | 7     | 2.229299 | 0.066311 |
| GOTERM_CC_FAT        | GO:0000323~lytic vacuole                                | 7     | 2.229299 | 0.067788 |
| GOTERM_CC_FAT        | GO:0005773~vacuole                                      | 7     | 2.229299 | 0.10932  |
| GOTERM_BP_FAT        | GO:0010035~response to inorganic substance              | 4     | 1.273885 | 0.157081 |
| Annotation Cluster 2 | Enrichment Score: 1.10397340316513                      |       |          |          |
| GOTERM_MF_FAT        | GO:0001871~pattern binding                              | 6     | 1.910828 | 0.043345 |
| GOTERM_MF_FAT        | GO:0030247~polysaccharide binding                       | 6     | 1.910828 | 0.043345 |
| GOTERM_MF_FAT        | GO:0030246~carbohydrate binding                         | 10    | 3.184713 | 0.049424 |
| GOTERM_MF_FAT        | GO:0005539~glycosaminoglycan binding                    | 5     | 1.592357 | 0.09196  |
| GOTERM_MF_FAT        | GO:0008201~heparin binding                              | 3     | 0.955414 | 0.353768 |
| Annotation Cluster 3 | Enrichment Score: 1.0317334272219372                    |       |          |          |
| GOTERM_BP_FAT        | GO:0006090~pyruvate metabolic process                   | 4     | 1.273885 | 0.00585  |
| GOTERM_BP_FAT        | GO:0006094~gluconeogenesis                              | 3     | 0.955414 | 0.035052 |
| GOTERM_BP_FAT        | GO:0034637~cellular carbohydrate biosynthetic process   | 4     | 1.273885 | 0.050522 |
| GOTERM_BP_FAT        | GO:0019319~hexose biosynthetic process                  | 3     | 0.955414 | 0.052745 |
| GOTERM_BP_FAT        | GO:0046364~monosaccharide biosynthetic process          | 3     | 0.955414 | 0.0772   |
| GOTERM_BP_FAT        | GO:0046165~alcohol biosynthetic process                 | 3     | 0.955414 | 0.104457 |
| GOTERM_BP_FAT        | GO:0016051~carbohydrate biosynthetic process            | 4     | 1.273885 | 0.126129 |
| GOTERM_BP_FAT        | GO:0006006~glucose metabolic process                    | 4     | 1.273885 | 0.345555 |
| GOTERM_BP_FAT        | GO:0019318~hexose metabolic process                     | 4     | 1.273885 | 0.462015 |
| GOTERM_BP_FAT        | GO:0005996~monosaccharide metabolic process             | 4     | 1.273885 | 0.542726 |
| Alcohol-Male         |                                                         |       |          |          |
| Category             | Term                                                    | Count | %        | PValue   |
| Annotation Cluster 1 | Enrichment Score: 1.9322218133369267                    |       |          |          |
| GOTERM_MF_FAT        | GO:0003755~peptidyl-prolyl cis-trans isomerase activity | 4     | 2.259887 | 0.003719 |
| GOTERM_MF_FAT        | GO:0016859~cis-trans isomerase activity                 | 4     | 2.259887 | 0.004359 |
| GOTERM_BP_FAT        | GO:0006457~protein folding                              | 4     | 2.259887 | 0.098512 |
| Annotation Cluster 2 | Enrichment Score: 1.5911453253393448                    |       |          |          |
| GOTERM_MF_FAT        | GO:0043167~ion binding                                  | 49    | 27.68362 | 0.007785 |
| GOTERM_MF_FAT        | GO:0043169~cation binding                               | 48    | 27.11864 | 0.010217 |
| GOTERM_MF_FAT        | GO:0046872~metal ion binding                            | 47    | 26.55367 | 0.014226 |
| GOTERM_MF_FAT        | GO:0046914~transition metal ion binding                 | 31    | 17.51412 | 0.080096 |
| GOTERM_MF_FAT        | GO:0008270~zinc ion binding                             | 25    | 14.12429 | 0.122171 |
| Annotation Cluster 3 | Enrichment Score: 1.3344374483809975                    |       |          |          |
| GOTERM_CC_FAT        | GO:0005604~basement membrane                            | 4     | 2.259887 | 0.028302 |
| GOTERM_CC_FAT        | GO:0044420~extracellular matrix part                    | 4     | 2.259887 | 0.050595 |
| GOTERM_CC_FAT        | GO:0005578~proteinaceous extracellular matrix           | 7     | 3.954802 | 0.05243  |
| GOTERM_CC_FAT        | GO:0031012~extracellular matrix                         | 7     | 3.954802 | 0.061199 |
